# Supplementary material for: Combining Impedance Spectroscopy and Information Visualization Methods to Optimize the Detection of Carbendazim Using Layer-by-Layer Films
Source: MDPI journal article supplement (doi:10.3390/chemosensors11040213), 2023-03-29
Supplement: s1 [file s1]

# Combining Impedance Spectroscopy and Information Visualization Methods to Optimize the Detection of Carbendazim Using Layer-by-Layer Films

Leonardo Negri Furini<sup>1,\*</sup>, José Diego Fernandes<sup>2</sup>, Douglas Henrique Vieira<sup>2</sup>,  
Luis Fernando do Carmo Morato<sup>2</sup>, Neri Alves<sup>2</sup> and Carlos José Leopoldo Constantino<sup>2</sup>

<sup>1</sup> Department of Physics, Federal University of Santa Catarina (UFSC), ,  
Florianópolis 88040-001, SC, Brazil

<sup>2</sup> Physics Department, Faculty of Science and Technology (FCT), São Paulo State  
University (UNESP), Presidente Prudente 19060-900, SP, Brazil

\* Correspondence: leonardo.furini@ufsc.br; Tel.: +55-48-3721-2869

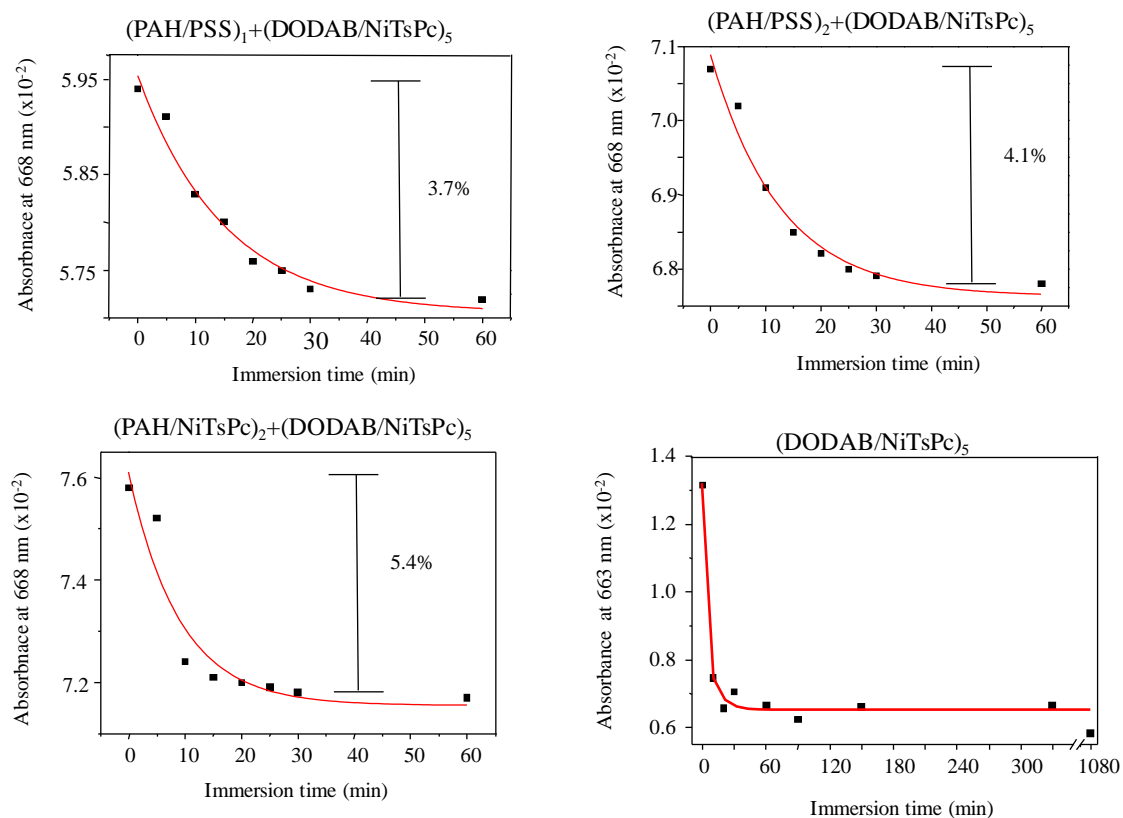

**Figure S1:** absorbance at fixed wavelength for LbL films on glass.

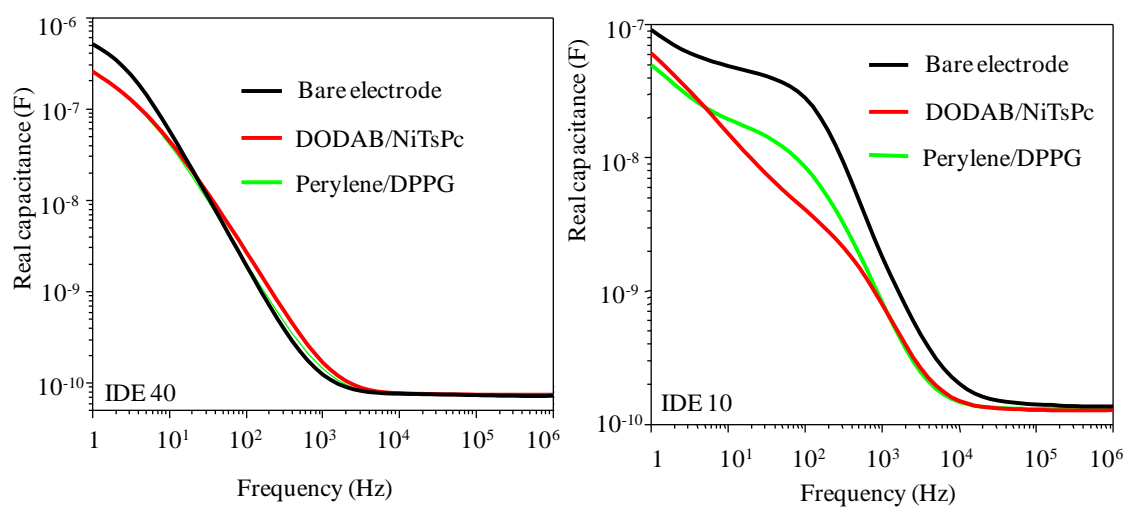

**Figure S2:** capacitance curves of sensing units (DODAB/NiTsPc)<sub>5</sub>, (Perylene/DPPG)<sub>5</sub> and bare electrode in ultrapure water. IDE 40 (left) and IDE 10 (right).

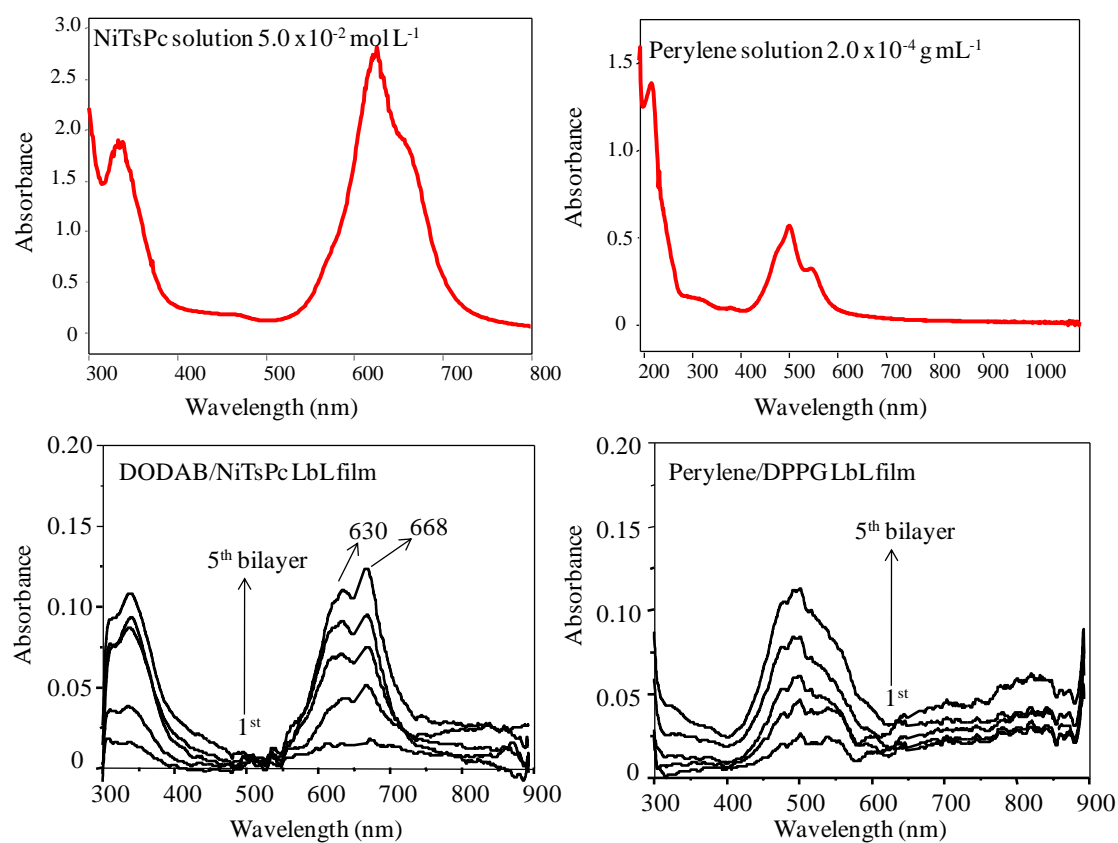

**Figure S3:** UV-Vis absorption spectra of NiTsPc and perylene in solution (top) and the smoothed (percentile filter) UV-Vis absorption spectra of DODAB/NiTsPc and Perylene/DPPG LbL films recorded every bilayer (bottom).

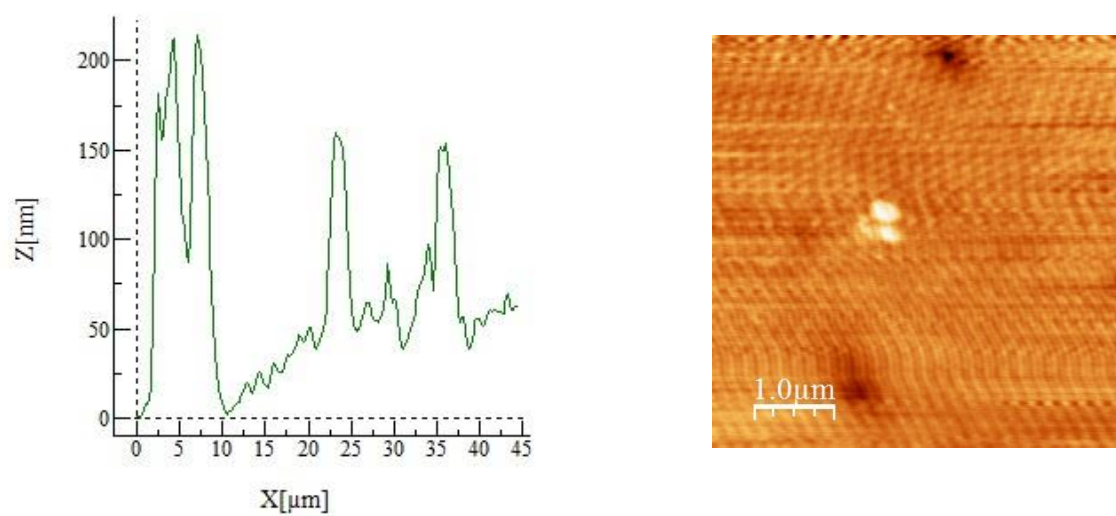

**Figure S4:** profile of AFM topography of 50 μm x 50 μm area for (DODAB/NiTsPc)<sub>5</sub> LbL film (left). AFM topography of glass slide annealed at 600 °C for 2h (right).

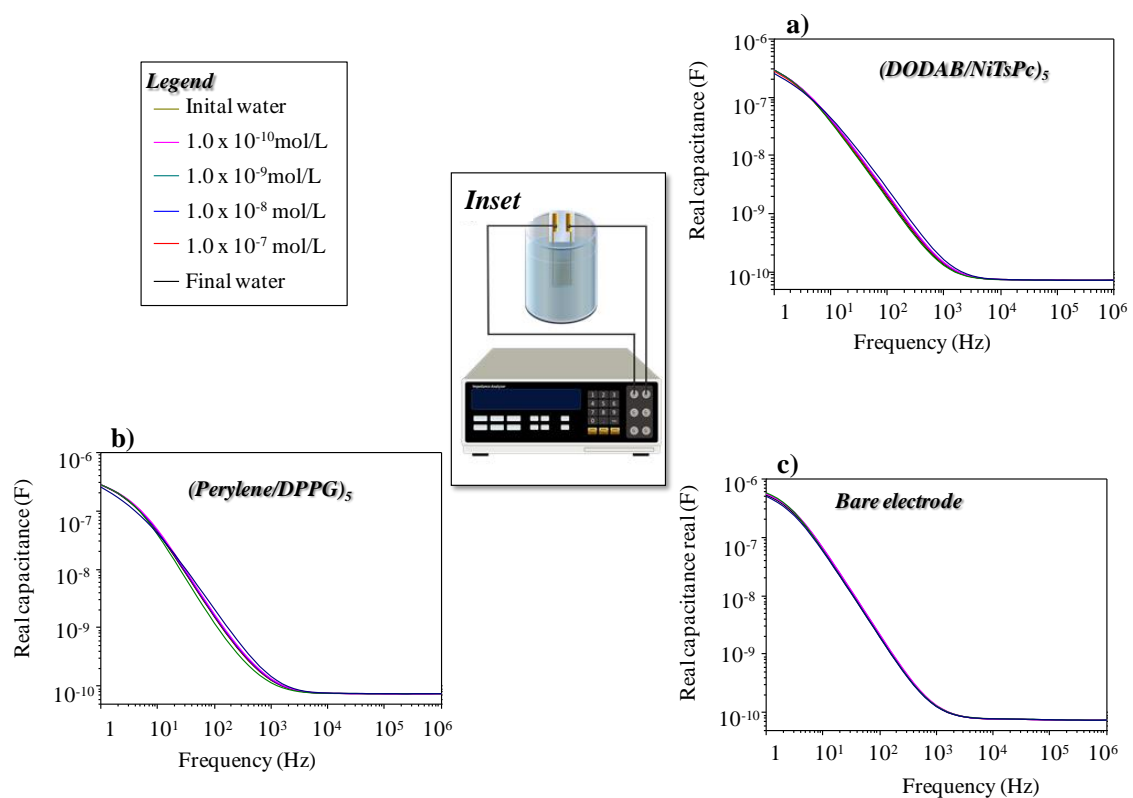

**Figure S5:** real capacitance vs. frequency for all sensing units in ultrapure water and MBC solutions. IDE 40.

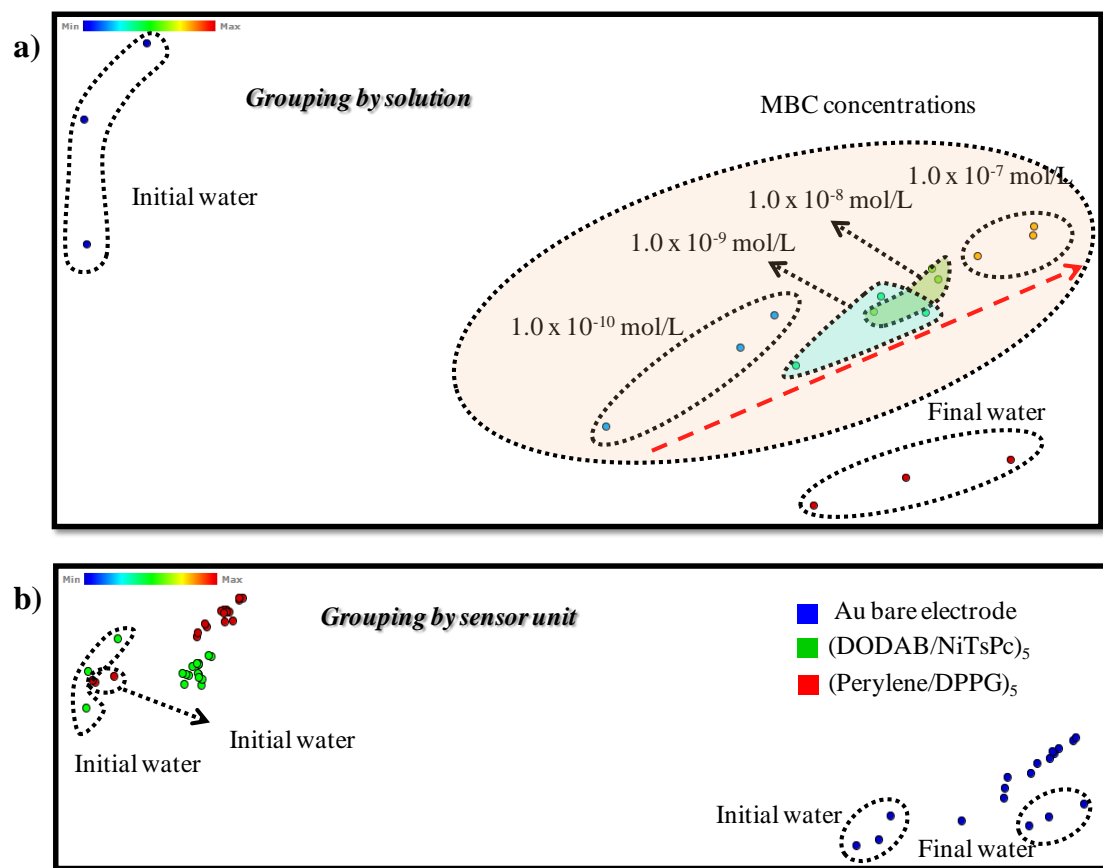

**Figure S6:** IDMAP projection from capacitance data a) of all sensing units combined, grouping by solution. b) IDMAP projection grouping by sensing unit. IDE 40.
